# Supplementary material
Source: Springer Nature journal article supplement (https://www.springermedizin.de/resource/supplementary/13063_2010_676_MOESM2_ESM.pdf/9618462)

# How to cool (1) for pilot feasibility and safety study of a simple, low cost method of whole body cooling in neonatal encephalopathy in the Special Care Baby Unit, Mulago Hospital, Kampala

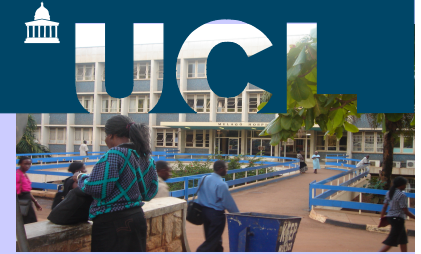

If the baby's rectal temperature is  $> 34^{\circ}\text{C}$  on admission

Start cooling with water bottles and record temperature according to daily log

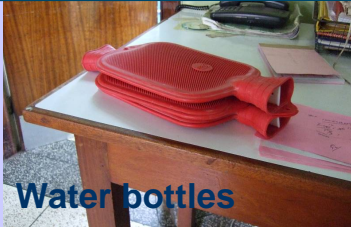

If rectal temp. is  $< 33.0^{\circ}\text{C}$ : add sheet one at a time on baby and check temp. again after 30'

If rectal temp. is or remains  $> 34^{\circ}\text{C}$  at any point of time or is not decreasing:

If rectal temperature is decreasing: wait and monitor temperature

If rectal temp. stays  $< 33.0^{\circ}\text{C}$ , add blanket on baby and check again temperature after 30'

If baby has no blankets or sheets on body: then change water in bottles and check temp. again after 30'

If baby is covered with blankets or sheets: start removing them one at the time and check rectal temp. again after 30'

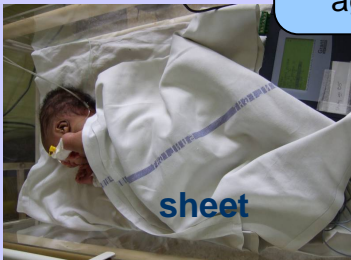

If the baby's rectal temp. stays  $< 33.0^{\circ}\text{C}$  add a second blanket and check again Temp. after 30'

If baby's rectal temp is  $< 32.0^{\circ}\text{C}$  and the baby is covered with blankets, remove water bottles, check temp. after 30'

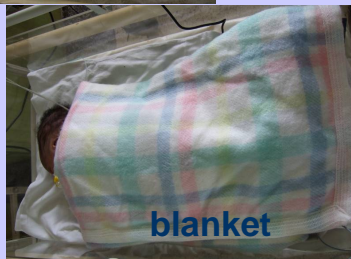

Supplement: MOESM2 [file 9618462]
